# Supplementary material for: TM4B180/− (TM = Hf, Ta, W, Re, Os): new structure construction with TM doped B wheel units
Source: Royal Society of Chemistry journal article supplement (doi:10.1039/d1ra02525b), 2021-01-01
Supplement: d1ra02525b1.pdf [file d1ra02525b1.pdf]

## Supporting Information

### **TM<sub>4</sub>B<sub>18</sub><sup>0/-</sup> (TM = Hf, Ta, W, Re, Os): new structure construction with TM doped B wheel units**

Zhen Wang, Qiuying Du, Sung Jin Park\*

*Key Laboratory of Materials Modification by Laser, Ion and Electron Beams (Dalian University of Technology), Ministry of Education, Dalian, 116024, China*

\* Corresponding author: [parksj@dlut.edu.cn](mailto:parksj@dlut.edu.cn)

**Fig. S1** Low-lying isomers of  $\text{TM}_4\text{B}_{18}$  (TM = Hf, Ta, W, Re, Os) at the levels of PBE0/TZVP.

$\text{Hf}_4\text{B}_{18}$

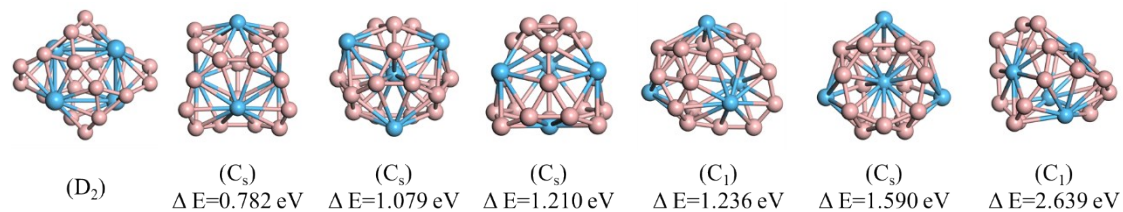

$\text{Ta}_4\text{B}_{18}$

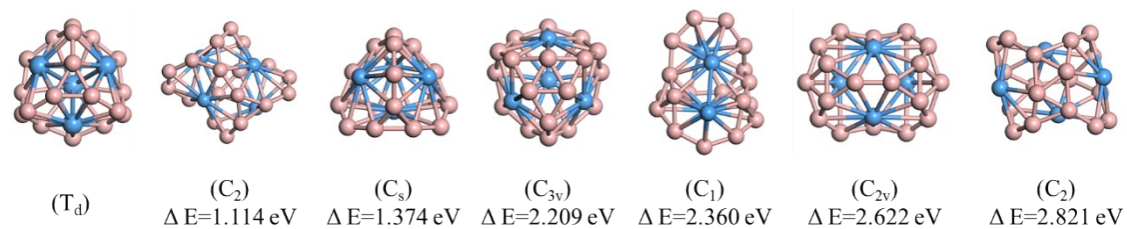

$\text{W}_4\text{B}_{18}$

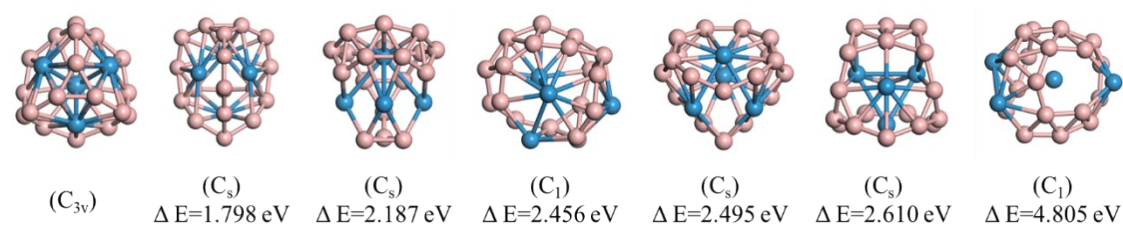

$\text{Re}_4\text{B}_{18}$

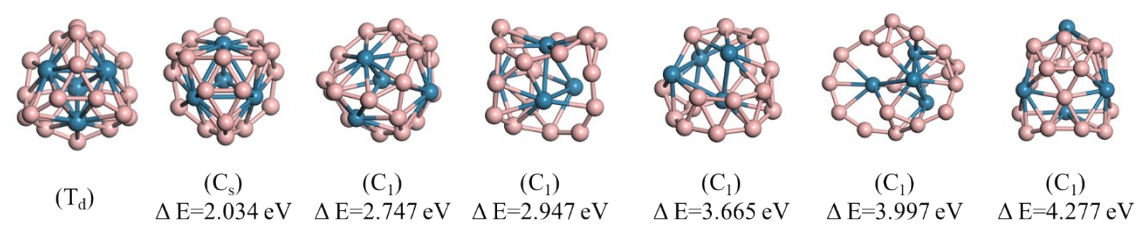

$\text{Os}_4\text{B}_{18}$

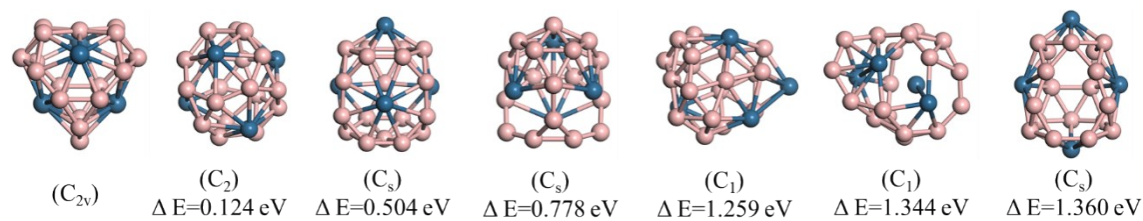

**Table S1.** The theoretical and experimental data for TM (TM = Hf, Ta, W, Re, Os) dimer: equilibrium bond lengths ( $R$ , in Å), vibrational frequencies ( $\omega$ , in  $\text{cm}^{-1}$ ), and magnetic moments ( $\mu$ , in  $\mu_B$ ). The values were calculated by using PBE0 functional under the basis set of def2-TZVP or LanL2DZ.

|                 | def2-TZVP |                               |       | LanL2DZ |                               |       | Experiment |                               |                     |
|-----------------|-----------|-------------------------------|-------|---------|-------------------------------|-------|------------|-------------------------------|---------------------|
|                 | $R$ (Å)   | $\omega$ ( $\text{cm}^{-1}$ ) | $\mu$ | $R$ (Å) | $\omega$ ( $\text{cm}^{-1}$ ) | $\mu$ | $R$ (Å)    | $\omega$ ( $\text{cm}^{-1}$ ) | $\mu$               |
| Hf <sub>2</sub> | 2.40      | 229.9                         | 2     | 2.61    | 193.4                         | 2     | 2.46       | 176.2±2.6                     | 2 <sup>1</sup>      |
| Ta <sub>2</sub> | 2.23      | 284.3                         | 4     | 2.25    | 295.3                         | 4     | 2.23       | 300.2±1.2                     | 4 <sup>1</sup>      |
| W <sub>2</sub>  | 2.00      | 421.0                         | 0     | 2.02    | 423.8                         | 0     | 2.18       | 336.8                         | 0 <sup>1</sup>      |
| Re <sub>2</sub> | 2.01      | 411.84                        | 2     | 2.04    | 407.5                         | 2     | 2.18       | 340±20                        | 2 <sup>1</sup>      |
| Os <sub>2</sub> | 2.22      | 302.3                         | 6     | 2.36    | 266.0                         | 6     | 2.2±0.05   | 300±20                        | 4/6 <sup>2, 3</sup> |

## References

- (1) X. Sun, J. Du, P. Zhang and G. Jiang, *J. Clust. Sci.*, 2010, **21**, 619-636.
- (2) J. Du, X. Sun and H. Wang, *Int. J. Quantum Chem.*, 2008, **108**, 1505-1517.
- (3) J. Kim and J. Kim, *Int. J. Quantum Chem.*, 2014, **114**, 1466-1471.

**Table S2.** The coordinates of the lowest energy structures of  $\text{TM}_4\text{B}_{18}$  (TM = Hf, Ta, W, Re, Os) at the levels of PBE0/TZVP.

Hf<sub>4</sub>B<sub>18</sub>

|    |             |             |             |
|----|-------------|-------------|-------------|
| B  | 0.70651100  | 1.20388200  | 2.15974200  |
| B  | -0.70651100 | -1.20388200 | 2.15974200  |
| B  | 0.00000000  | 0.00000000  | 2.88498400  |
| B  | -0.70651100 | 1.20388200  | -2.15974200 |
| B  | -2.07058300 | 1.45831100  | -1.04040900 |
| B  | -0.54728100 | 1.83538900  | -0.64737800 |
| B  | -3.26659100 | 0.63343900  | -0.43182200 |
| B  | -3.26659100 | -0.63343900 | 0.43182200  |
| B  | -2.07058300 | -1.45831100 | 1.04040900  |
| B  | 0.54728100  | 1.83538900  | 0.64737800  |
| B  | -0.54728100 | -1.83538900 | 0.64737800  |
| B  | 2.07058300  | -1.45831100 | -1.04040900 |
| B  | 0.54728100  | -1.83538900 | -0.64737800 |
| B  | 2.07058300  | 1.45831100  | 1.04040900  |
| B  | 3.26659100  | -0.63343900 | -0.43182200 |
| B  | 0.00000000  | 0.00000000  | -2.88498400 |
| B  | 0.70651100  | -1.20388200 | -2.15974200 |
| B  | 3.26659100  | 0.63343900  | 0.43182200  |
| Hf | -1.54379500 | 0.88594600  | 1.29151100  |
| Hf | -1.54379500 | -0.88594600 | -1.29151100 |
| Hf | 1.54379500  | -0.88594600 | 1.29151100  |
| Hf | 1.54379500  | 0.88594600  | -1.29151100 |

Ta<sub>4</sub>B<sub>18</sub>

|   |             |             |             |
|---|-------------|-------------|-------------|
| B | -0.99553200 | 0.99553200  | 2.19516900  |
| B | 0.00000000  | 0.00000000  | 2.87894200  |
| B | 0.99553200  | -0.99553200 | 2.19516900  |
| B | -2.19516900 | 0.99553200  | 0.99553200  |
| B | -0.99553200 | 2.19516900  | 0.99553200  |
| B | 0.00000000  | 2.87894200  | 0.00000000  |
| B | 0.99553200  | 2.19516900  | -0.99553200 |
| B | 2.87894200  | 0.00000000  | 0.00000000  |
| B | 2.19516900  | -0.99553200 | 0.99553200  |
| B | 0.99553200  | -2.19516900 | 0.99553200  |
| B | 2.19516900  | 0.99553200  | -0.99553200 |
| B | 0.00000000  | -2.87894200 | 0.00000000  |
| B | -0.99553200 | -2.19516900 | -0.99553200 |

|    |             |             |             |
|----|-------------|-------------|-------------|
| B  | -2.19516900 | -0.99553200 | -0.99553200 |
| B  | -2.87894200 | 0.00000000  | 0.00000000  |
| B  | 0.99553200  | 0.99553200  | -2.19516900 |
| B  | 0.00000000  | 0.00000000  | -2.87894200 |
| B  | -0.99553200 | -0.99553200 | -2.19516900 |
| Ta | 1.06468000  | 1.06468000  | 1.06468000  |
| Ta | -1.06468000 | -1.06468000 | 1.06468000  |
| Ta | 1.06468000  | -1.06468000 | -1.06468000 |
| Ta | -1.06468000 | 1.06468000  | -1.06468000 |

$W_4B_{18}$

|   |             |             |             |
|---|-------------|-------------|-------------|
| B | -2.03353300 | 1.17406100  | 1.70242400  |
| B | 0.00000000  | 0.97512100  | -2.28906400 |
| B | 0.84447900  | -0.48756000 | -2.28906400 |
| B | -0.84447900 | -0.48756000 | -2.28906400 |
| B | 0.00000000  | 2.35600200  | -1.56586400 |
| B | 0.00000000  | 2.64042900  | -0.03680600 |
| B | 0.85986300  | 2.14523400  | 1.32222400  |
| B | -0.85986300 | 2.14523400  | 1.32222400  |
| B | 0.00000000  | -2.34812200 | 1.70242400  |
| B | -2.28775900 | -0.32795400 | 1.32222400  |
| B | -1.42789600 | -1.81728100 | 1.32222400  |
| B | -2.04035700 | -1.17800100 | -1.56586400 |
| B | 2.04035700  | -1.17800100 | -1.56586400 |
| B | 2.28667900  | -1.32021500 | -0.03680600 |
| B | 2.03353300  | 1.17406100  | 1.70242400  |
| B | 2.28775900  | -0.32795400 | 1.32222400  |
| B | 1.42789600  | -1.81728100 | 1.32222400  |
| B | -2.28667900 | -1.32021500 | -0.03680600 |
| W | 1.45615100  | 0.84070900  | -0.52171300 |
| W | -1.45615100 | 0.84070900  | -0.52171300 |
| W | 0.00000000  | -1.68141900 | -0.52171300 |
| W | 0.00000000  | 0.00000000  | 1.47288000  |

$Re_4B_{18}$

|   |             |            |            |
|---|-------------|------------|------------|
| B | 2.25714400  | 0.84714300 | 0.99451000 |
| B | -1.40776800 | 0.00000000 | 2.19469600 |
| B | 1.40776800  | 0.00000000 | 2.19469600 |
| B | 0.00000000  | 0.00000000 | 2.88515700 |
| B | 2.04035900  | 2.04035900 | 0.00000000 |

|    |             |             |             |
|----|-------------|-------------|-------------|
| B  | 0.84714300  | 2.25714400  | -0.99451000 |
| B  | -0.84714300 | 2.25714400  | -0.99451000 |
| B  | -2.04035900 | 2.04035900  | 0.00000000  |
| B  | -2.25714400 | -0.84714300 | 0.99451000  |
| B  | -2.25714400 | 0.84714300  | 0.99451000  |
| B  | 2.25714400  | -0.84714300 | 0.99451000  |
| B  | 2.04035900  | -2.04035900 | 0.00000000  |
| B  | 0.84714300  | -2.25714400 | -0.99451000 |
| B  | 0.00000000  | 1.40776800  | -2.19469600 |
| B  | -0.84714300 | -2.25714400 | -0.99451000 |
| B  | -2.04035900 | -2.04035900 | 0.00000000  |
| B  | 0.00000000  | 0.00000000  | -2.88515700 |
| B  | 0.00000000  | -1.40776800 | -2.19469600 |
| Re | 0.00000000  | 1.28567000  | 0.91125400  |
| Re | 0.00000000  | -1.28567000 | 0.91125400  |
| Re | 1.28567000  | 0.00000000  | -0.91125400 |
| Re | -1.28567000 | 0.00000000  | -0.91125400 |

Os<sub>4</sub>B<sub>18</sub>

|    |             |             |             |
|----|-------------|-------------|-------------|
| B  | 0.00000000  | 2.49075300  | -0.74035200 |
| B  | 2.02520200  | 0.85442100  | 0.78268500  |
| B  | 1.36159800  | 0.00000000  | 2.08315200  |
| B  | 1.46231700  | 1.87839700  | -0.34880900 |
| B  | -1.46231700 | 1.87839700  | -0.34880900 |
| B  | -1.36159800 | 0.00000000  | 2.08315200  |
| B  | -2.02520200 | 0.85442100  | 0.78268500  |
| B  | 0.82805700  | 1.55985500  | -1.91185000 |
| B  | 2.02520200  | -0.85442100 | 0.78268500  |
| B  | 1.46231700  | -1.87839700 | -0.34880900 |
| B  | 0.00000000  | 0.00000000  | 2.85330600  |
| B  | 0.82805700  | -1.55985500 | -1.91185000 |
| B  | -0.82805700 | 1.55985500  | -1.91185000 |
| B  | 0.00000000  | 0.00000000  | -1.90524400 |
| B  | -1.46231700 | -1.87839700 | -0.34880900 |
| B  | -0.82805700 | -1.55985500 | -1.91185000 |
| B  | -2.02520200 | -0.85442100 | 0.78268500  |
| B  | 0.00000000  | -2.49075300 | -0.74035200 |
| Os | 0.00000000  | 1.57030000  | 1.24152500  |
| Os | 0.00000000  | -1.57030000 | 1.24152500  |
| Os | 2.02770400  | 0.00000000  | -1.16658300 |
| Os | -2.02770400 | 0.00000000  | -1.16658300 |

**Table S3.** The coordinates of the lowest energy structures of  $\text{TM}_4\text{B}_{18}^-$  (TM = Hf, Ta, W, Re, Os) at the levels of PBE0/TZVP.

$\text{Hf}_4\text{B}_{18}^-$

|    |             |             |             |
|----|-------------|-------------|-------------|
| B  | -0.70118400 | 2.11963000  | 1.22842100  |
| B  | 0.70118400  | 2.14303400  | -1.19767300 |
| B  | 0.00490700  | 2.86004300  | 0.01857400  |
| B  | 0.70118400  | -2.11963000 | 1.22842100  |
| B  | 2.03961300  | -1.04970800 | 1.47010600  |
| B  | 0.53342100  | -0.65476900 | 2.03259800  |
| B  | 3.25088000  | -0.44725500 | 0.64703900  |
| B  | 3.25979400  | 0.42096300  | -0.62163900 |
| B  | 2.07162400  | 1.02137900  | -1.47283100 |
| B  | -0.53342100 | 0.65476900  | 2.03259800  |
| B  | 0.54895800  | 0.64710900  | -1.87842700 |
| B  | -2.07162400 | -1.02137900 | -1.47283100 |
| B  | -0.54895800 | -0.64710900 | -1.87842700 |
| B  | -2.03961300 | 1.04970800  | 1.47010600  |
| B  | -3.25979400 | -0.42096300 | -0.62163900 |
| B  | -0.00490700 | -2.86004300 | 0.01857400  |
| B  | -0.70118400 | -2.14303400 | -1.19767300 |
| B  | -3.25088000 | 0.44725500  | 0.64703900  |
| Hf | 1.48794000  | 1.22124800  | 0.89906300  |
| Hf | 1.55209300  | -1.29877800 | -0.91477000 |
| Hf | -1.55209300 | 1.29877800  | -0.91477000 |
| Hf | -1.48794000 | -1.22124800 | 0.89906300  |

$\text{Ta}_4\text{B}_{18}^-$

|   |             |             |             |
|---|-------------|-------------|-------------|
| B | 0.00000000  | 2.59065100  | -0.14163000 |
| B | 0.00000000  | 2.34389700  | -1.69702800 |
| B | 0.00000000  | 0.98041700  | -2.48024400 |
| B | 0.84607100  | 2.10996100  | 1.25356400  |
| B | -0.84607100 | 2.10996100  | 1.25356400  |
| B | -2.25031500 | -0.32226100 | 1.25356400  |
| B | -2.04453200 | 1.18041100  | 1.64148900  |
| B | -2.02987400 | -1.17194900 | -1.69702800 |
| B | -0.84906600 | -0.49020900 | -2.48024400 |
| B | 0.84906600  | -0.49020900 | -2.48024400 |

|    |             |             |             |
|----|-------------|-------------|-------------|
| B  | -2.24357000 | -1.29532600 | -0.14163000 |
| B  | 2.02987400  | -1.17194900 | -1.69702800 |
| B  | 2.24357000  | -1.29532600 | -0.14163000 |
| B  | 2.25031500  | -0.32226100 | 1.25356400  |
| B  | 2.04453200  | 1.18041100  | 1.64148900  |
| B  | -1.40424400 | -1.78769900 | 1.25356400  |
| B  | 1.40424400  | -1.78769900 | 1.25356400  |
| B  | 0.00000000  | -2.36082200 | 1.64148900  |
| Ta | -1.47311800 | 0.85050500  | -0.63097500 |
| Ta | 1.47311800  | 0.85050500  | -0.63097500 |
| Ta | 0.00000000  | -1.70101000 | -0.63097500 |
| Ta | 0.00000000  | 0.00000000  | 1.92791500  |

$W_4B_{18}^-$

|   |             |             |             |
|---|-------------|-------------|-------------|
| B | -2.02951400 | -1.17174000 | -1.60915000 |
| B | 0.00000000  | 2.62758500  | -0.07278700 |
| B | 0.85283400  | 2.14140900  | 1.29798700  |
| B | -0.85283400 | 2.14140900  | 1.29798700  |
| B | 0.00000000  | 2.34348100  | -1.60915000 |
| B | 0.00000000  | 0.97456000  | -2.36318800 |
| B | 0.84399400  | -0.48728000 | -2.36318800 |
| B | -0.84399400 | -0.48728000 | -2.36318800 |
| B | 0.00000000  | -2.34955000 | 1.67180900  |
| B | -2.27555500 | -1.31379300 | -0.07278700 |
| B | -1.42809700 | -1.80928000 | 1.29798700  |
| B | -2.03477000 | 1.17477500  | 1.67180900  |
| B | 2.03477000  | 1.17477500  | 1.67180900  |
| B | 2.28093100  | -0.33212800 | 1.29798700  |
| B | 2.02951400  | -1.17174000 | -1.60915000 |
| B | 2.27555500  | -1.31379300 | -0.07278700 |
| B | 1.42809700  | -1.80928000 | 1.29798700  |
| B | -2.28093100 | -0.33212800 | 1.29798700  |
| W | 1.41551100  | 0.81724600  | -0.53770900 |
| W | -1.41551100 | 0.81724600  | -0.53770900 |
| W | 0.00000000  | 0.00000000  | 1.56799400  |
| W | 0.00000000  | -1.63449200 | -0.53770900 |

$Re_4B_{18}^-$



|    |             |             |             |
|----|-------------|-------------|-------------|
| B  | 2.24774700  | 0.84764800  | 1.00771800  |
| B  | -1.40238800 | 0.00000000  | 2.23189300  |
| B  | 1.40238800  | 0.00000000  | 2.23189300  |
| B  | 0.00000000  | 0.00000000  | 2.93860200  |
| B  | 2.03528000  | 2.03528000  | 0.00000000  |
| B  | 0.84764800  | 2.24774700  | -1.00771800 |
| B  | -0.84764800 | 2.24774700  | -1.00771800 |
| B  | -2.03528000 | 2.03528000  | 0.00000000  |
| B  | -2.24774700 | -0.84764800 | 1.00771800  |
| B  | -2.24774700 | 0.84764800  | 1.00771800  |
| B  | 2.24774700  | -0.84764800 | 1.00771800  |
| B  | 2.03528000  | -2.03528000 | 0.00000000  |
| B  | 0.84764800  | -2.24774700 | -1.00771800 |
| B  | 0.00000000  | 1.40238800  | -2.23189300 |
| B  | -0.84764800 | -2.24774700 | -1.00771800 |
| B  | -2.03528000 | -2.03528000 | 0.00000000  |
| B  | 0.00000000  | 0.00000000  | -2.93860200 |
| B  | 0.00000000  | -1.40238800 | -2.23189300 |
| Re | 0.00000000  | 1.27046000  | 0.91277800  |
| Re | 0.00000000  | -1.27046000 | 0.91277800  |
| Re | 1.27046000  | 0.00000000  | -0.91277800 |
| Re | -1.27046000 | 0.00000000  | -0.91277800 |

Os<sub>4</sub>B<sub>18</sub><sup>-</sup>

|   |             |             |             |
|---|-------------|-------------|-------------|
| B | 0.00000000  | 2.47429100  | -0.72918800 |
| B | 2.03098300  | 0.85228100  | 0.79900600  |
| B | 1.36568100  | 0.00000000  | 2.12381600  |
| B | 1.45875100  | 1.85495000  | -0.34835800 |
| B | -1.45875100 | 1.85495000  | -0.34835800 |
| B | -1.36568100 | 0.00000000  | 2.12381600  |
| B | -2.03098300 | 0.85228100  | 0.79900600  |
| B | 0.82430300  | 1.55310300  | -1.93353800 |
| B | 2.03098300  | -0.85228100 | 0.79900600  |
| B | 1.45875100  | -1.85495000 | -0.34835800 |
| B | 0.00000000  | 0.00000000  | 2.91095500  |
| B | 0.82430300  | -1.55310300 | -1.93353800 |
| B | -0.82430300 | 1.55310300  | -1.93353800 |
| B | 0.00000000  | 0.00000000  | -1.88029200 |
| B | -1.45875100 | -1.85495000 | -0.34835800 |
| B | -0.82430300 | -1.55310300 | -1.93353800 |
| B | -2.03098300 | -0.85228100 | 0.79900600  |

|    |             |             |             |
|----|-------------|-------------|-------------|
| B  | 0.00000000  | -2.47429100 | -0.72918800 |
| Os | 0.00000000  | 1.53415400  | 1.22708700  |
| Os | 0.00000000  | -1.53415400 | 1.22708700  |
| Os | 2.04997700  | 0.00000000  | -1.15762500 |
| Os | -2.04997700 | 0.00000000  | -1.15762500 |
